# Supplementary material for: Heteroleptic arene Ru(ii) dipyrrinato complexes: DNA, protein binding and anti-cancer activity against the ACHN cancer cell line
Source: Royal Society of Chemistry journal article supplement (doi:10.1039/c6dt00446f), 2016-01-01
Supplement: c6dt00446f1.pdf [file c6dt00446f1.pdf]

## Heteroleptic arene Ru(II) dipyrrinato complexes: DNA, protein binding and anti-cancer activity against ACHN cancer cell line

Rakesh Kumar Gupta,<sup>a</sup> Amit Kumar,<sup>a</sup> Rajendra Prasad Paitandi,<sup>a</sup> Roop Shikha Singh,<sup>a</sup> Sujay Mukhopadhyay,<sup>a</sup> Shiv Prakash Verma,<sup>b</sup> Parimal Das<sup>b</sup> and Daya Shankar Pandey<sup>\*a</sup>

<sup>a</sup>Department of Chemistry, Institute of Science, Banaras Hindu University, Varanasi - 221 005 (U.P.) India

<sup>b</sup>Centre for Genetic Disorders, Banaras Hindu University, Varanasi - 221 005 (U.P.) India

### Contents

---

|                                                                                |         |
|--------------------------------------------------------------------------------|---------|
| 1. NMR spectra of the ligands and complexes 1–4.....                           | S2-S7   |
| 2. HOMO LUMO diagram of complexes 1–4.....                                     | S8-S9   |
| 3. Absorption titration spectra of 1, 2 and 4 with CT DNA.....                 | S10     |
| 4. Emission spectra from EB bound to DNA with 1, 2 and 4.....                  | S11     |
| 5. Emission spectra of BSA with 1, 2 and 4.....                                | S12     |
| 6. Stern-Volmer plot for complexes at different temperature.....               | S13     |
| 7. Synchronous spectra of BSA with 1, 2 and 4 at $\Delta\lambda = 60$ nm.....  | S14     |
| 8. Synchronous spectra of BSA with 1, 2 and 4 at $\Delta\lambda = 15$ nm.....  | S15     |
| 9. 3D fluorescence spectra of BSA with 1, 2 and 4.....                         | S16     |
| 10. HRMS spectra of ligand and 1–4.....                                        | S17-S19 |
| 11. Molecular docking of 1, 2 and 4 with DNA and Protein.....                  | S20-S25 |
| 12. Anti-proliferative profiles of 1–4.....                                    | S26     |
| 13. Selected bond lengths and bond angles (°) from DFT calculation.....        | S27     |
| 14. HOMO LUMO energy of complexes 1–4.....                                     | S27     |
| 15. Absorption Spectral data of 1–4 bound to CT DNA.....                       | S28     |
| 16. Quenching constant and binding constant ( $K_{bin}$ ) of 1–4 with BSA..... | S29     |
| 17. 3D fluorescence spectral parameters of the BSA and BSA + 1–4.....          | S30     |
| 18. Log <i>P</i> Values for Complexes 1–4.....                                 | S31     |
| 19. Binding site of protein (HSA).....                                         | S32-S33 |

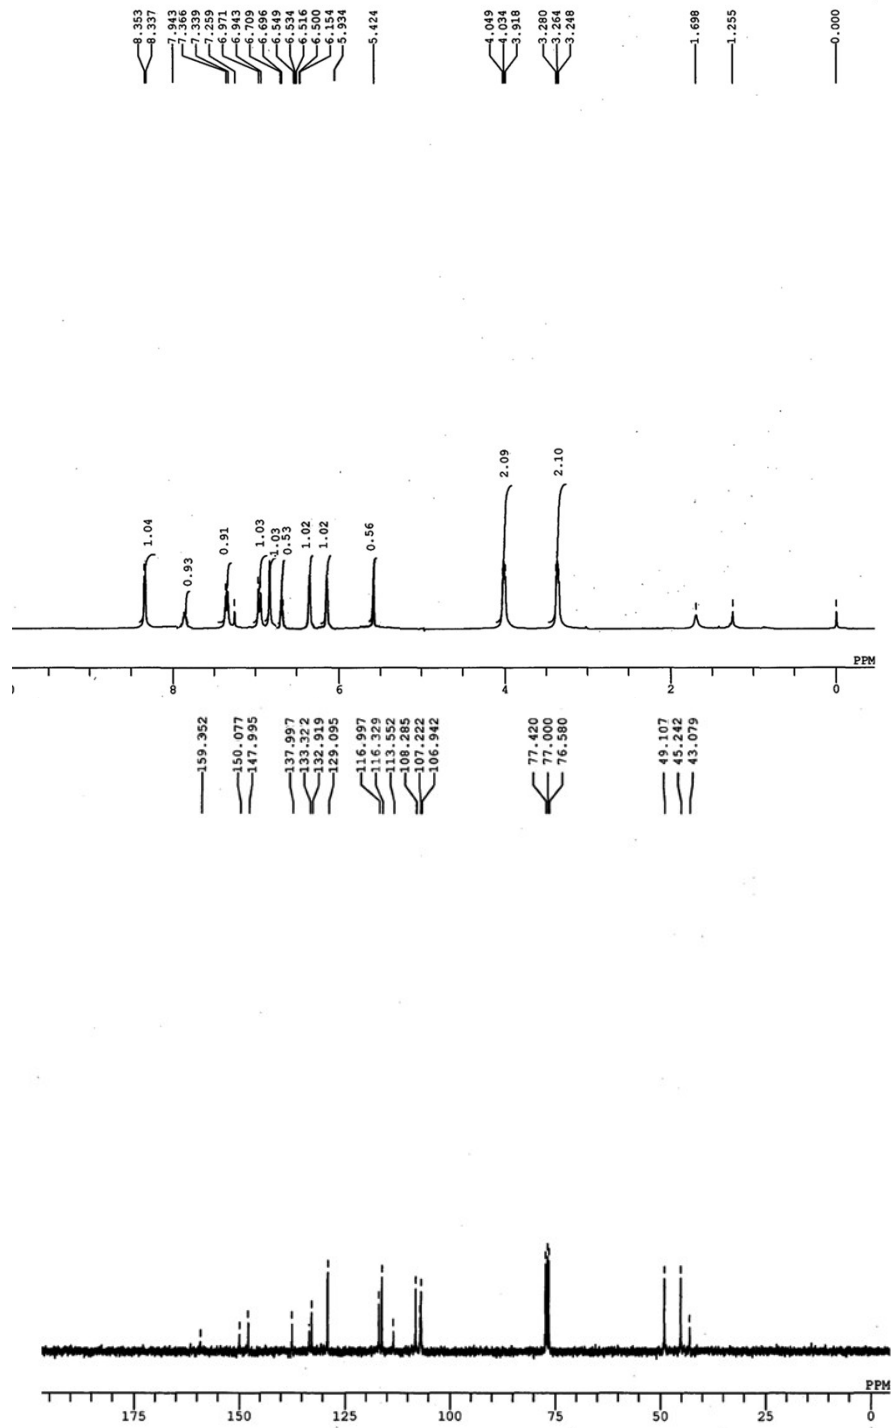

Fig. S1 <sup>1</sup>H (top) and <sup>13</sup>C NMR (bottom) spectra of pmpzdpmH in CDCl<sub>3</sub>.

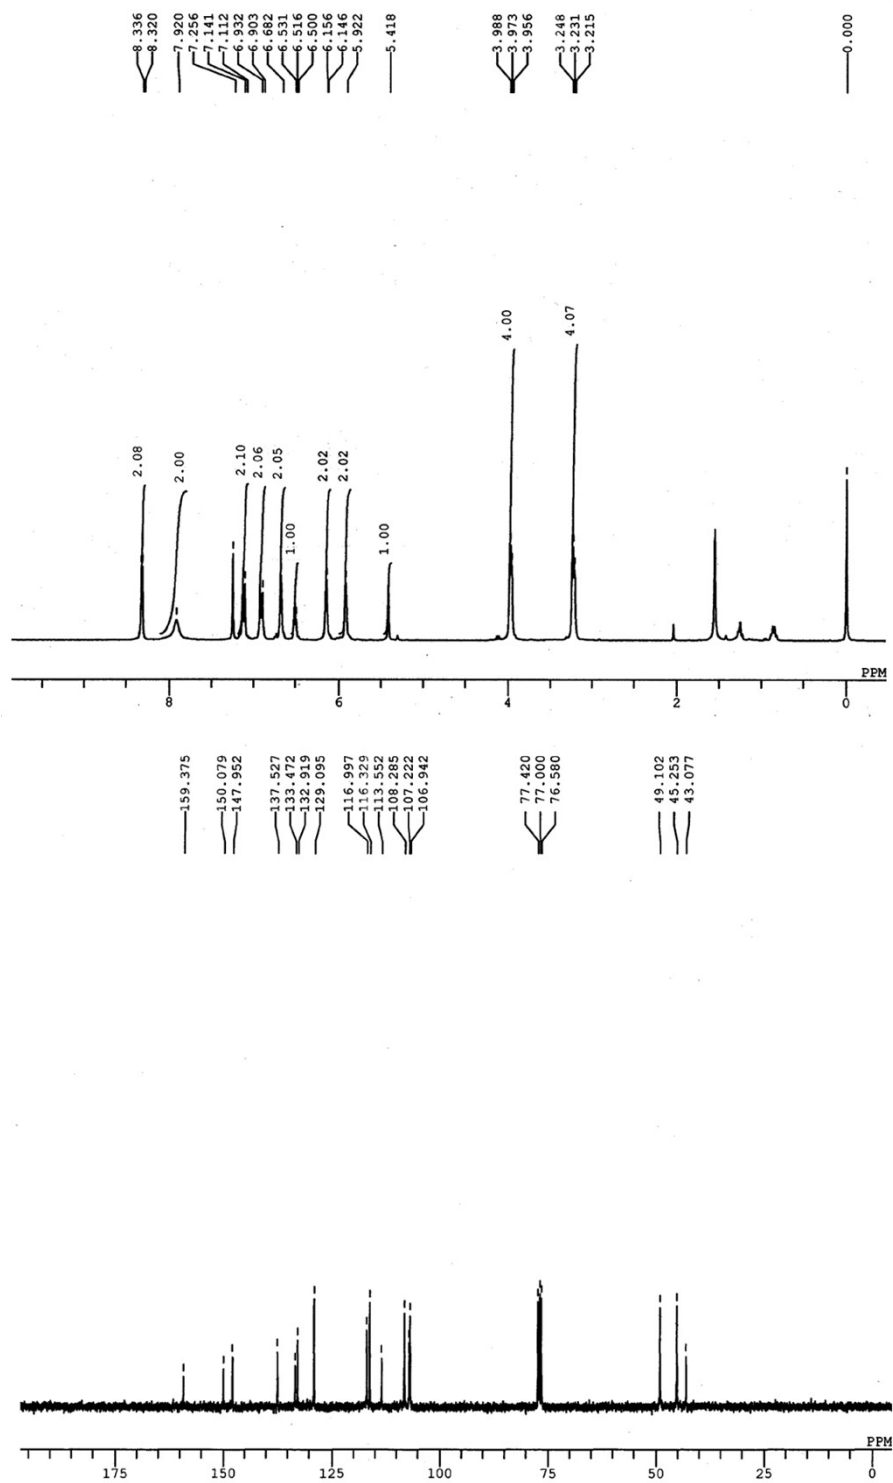

Fig. S2 <sup>1</sup>H (top) and <sup>13</sup>C NMR (bottom) spectra of pypzdpmH in CDCl<sub>3</sub>.

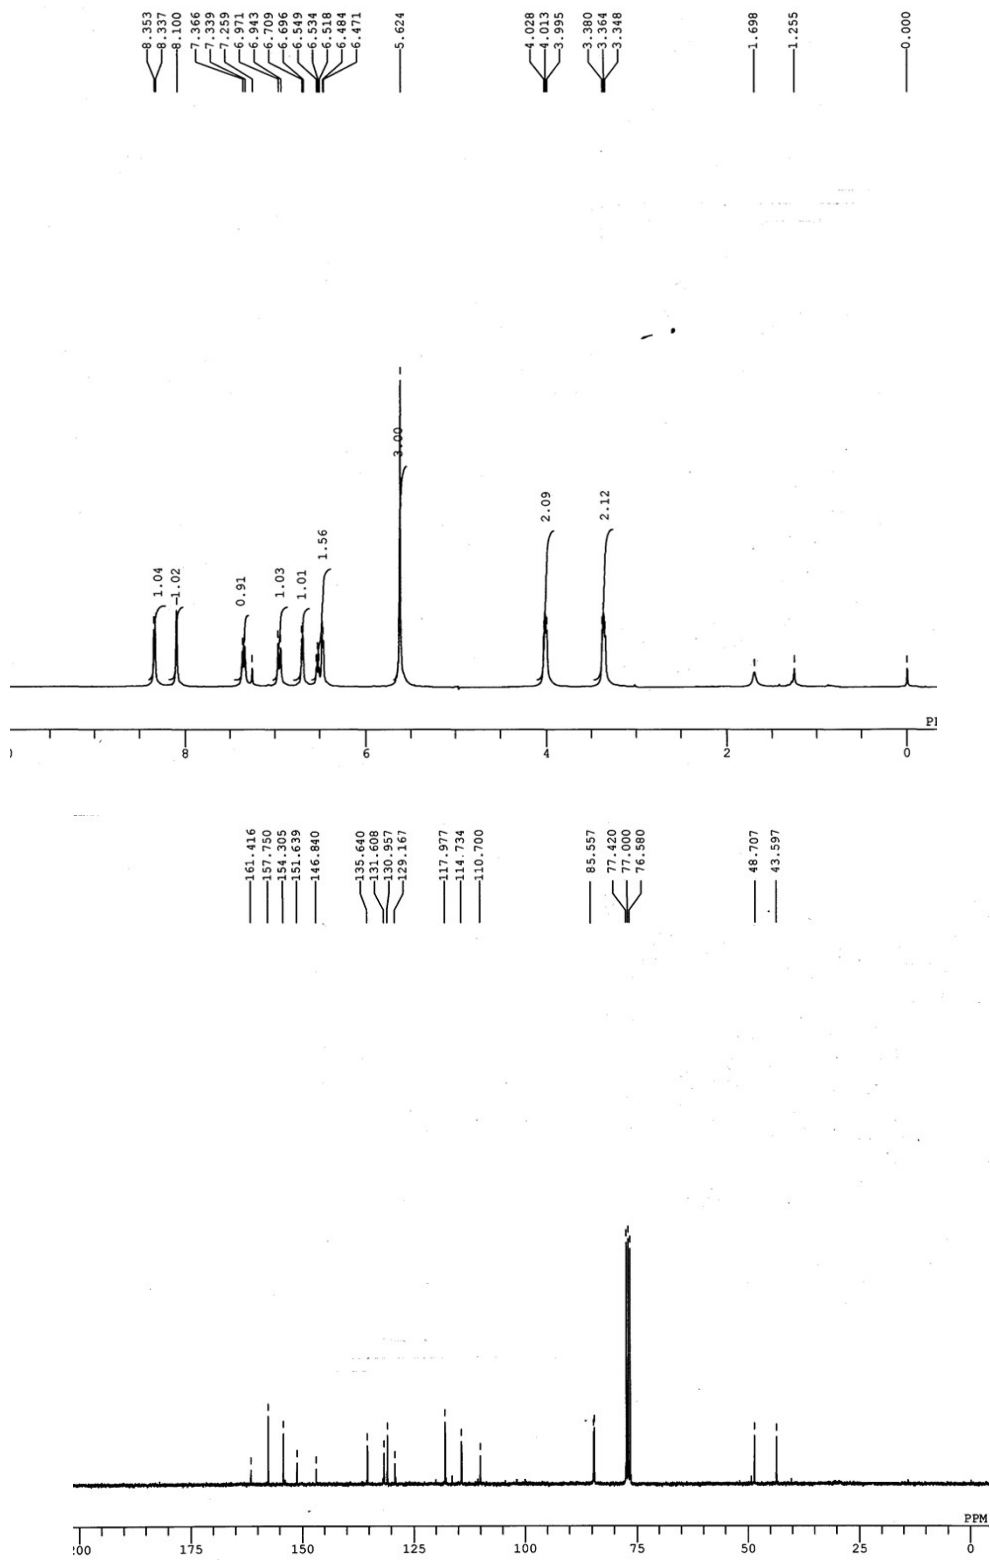

**Fig. S3** <sup>1</sup>H (top) and <sup>13</sup>C NMR (bottom) spectra of **1** in CDCl<sub>3</sub>.

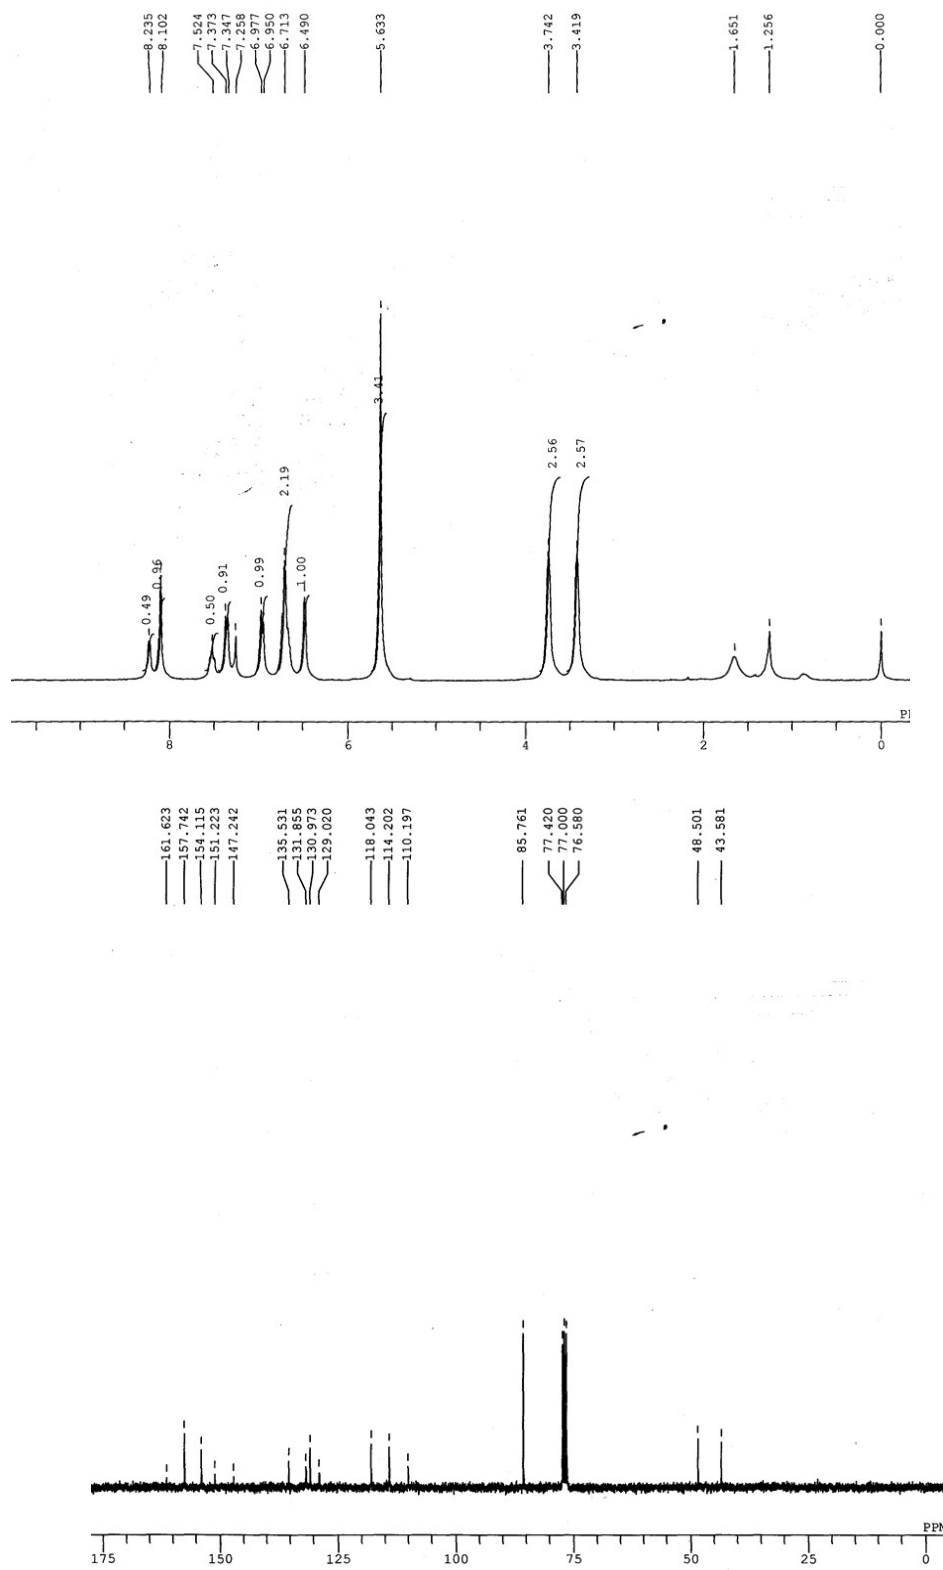

Fig. S4 <sup>1</sup>H (top) and <sup>13</sup>C NMR (bottom) spectra of **2** in CDCl<sub>3</sub>.

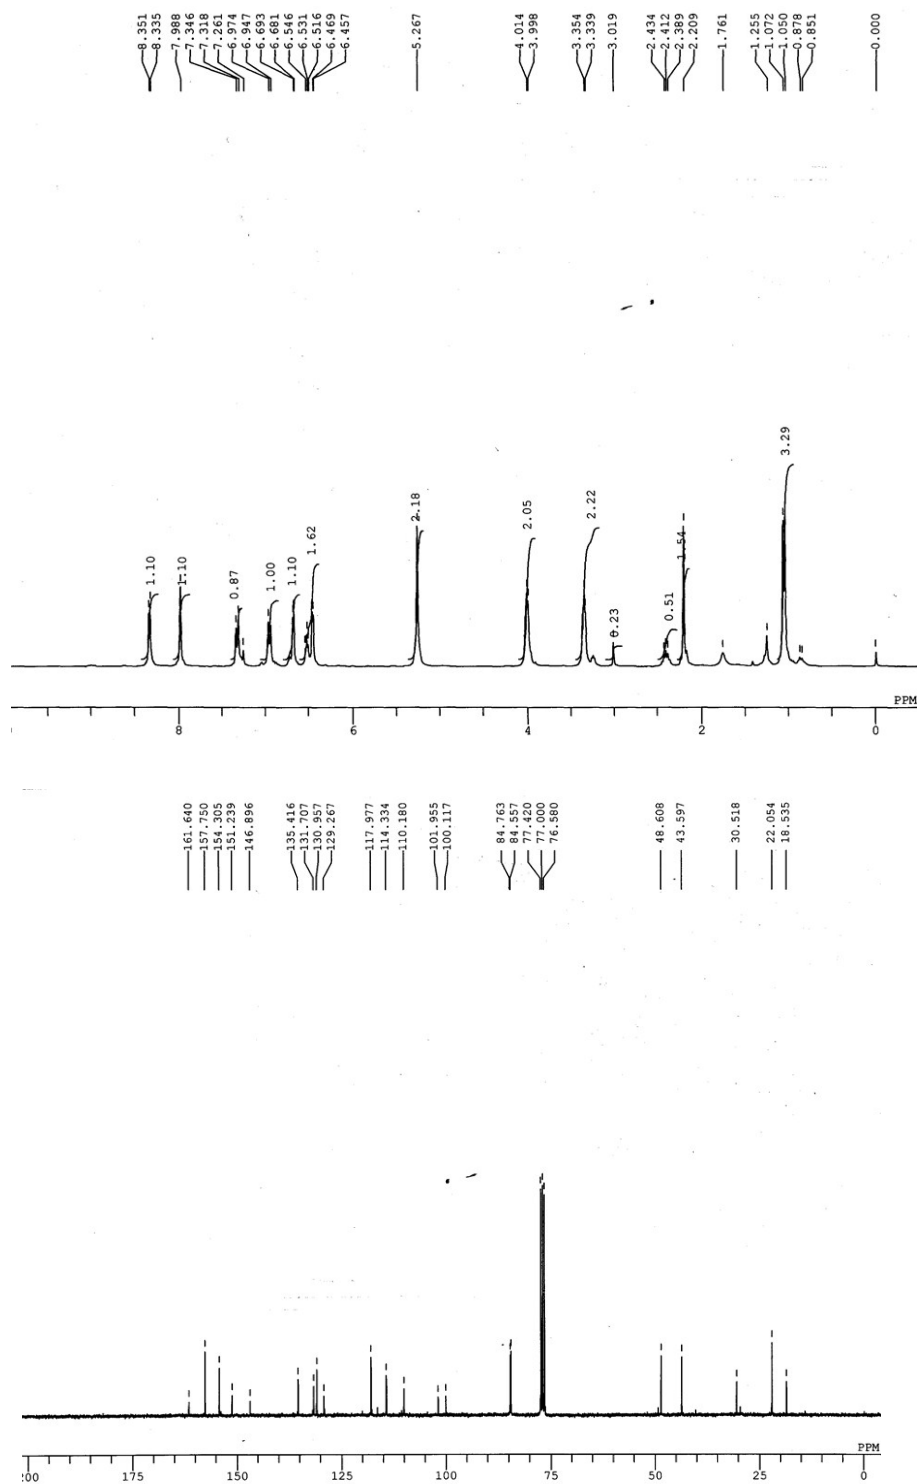

Fig. S5 <sup>1</sup>H (top) and <sup>13</sup>C NMR (bottom) spectra of **3** in CDCl<sub>3</sub>.

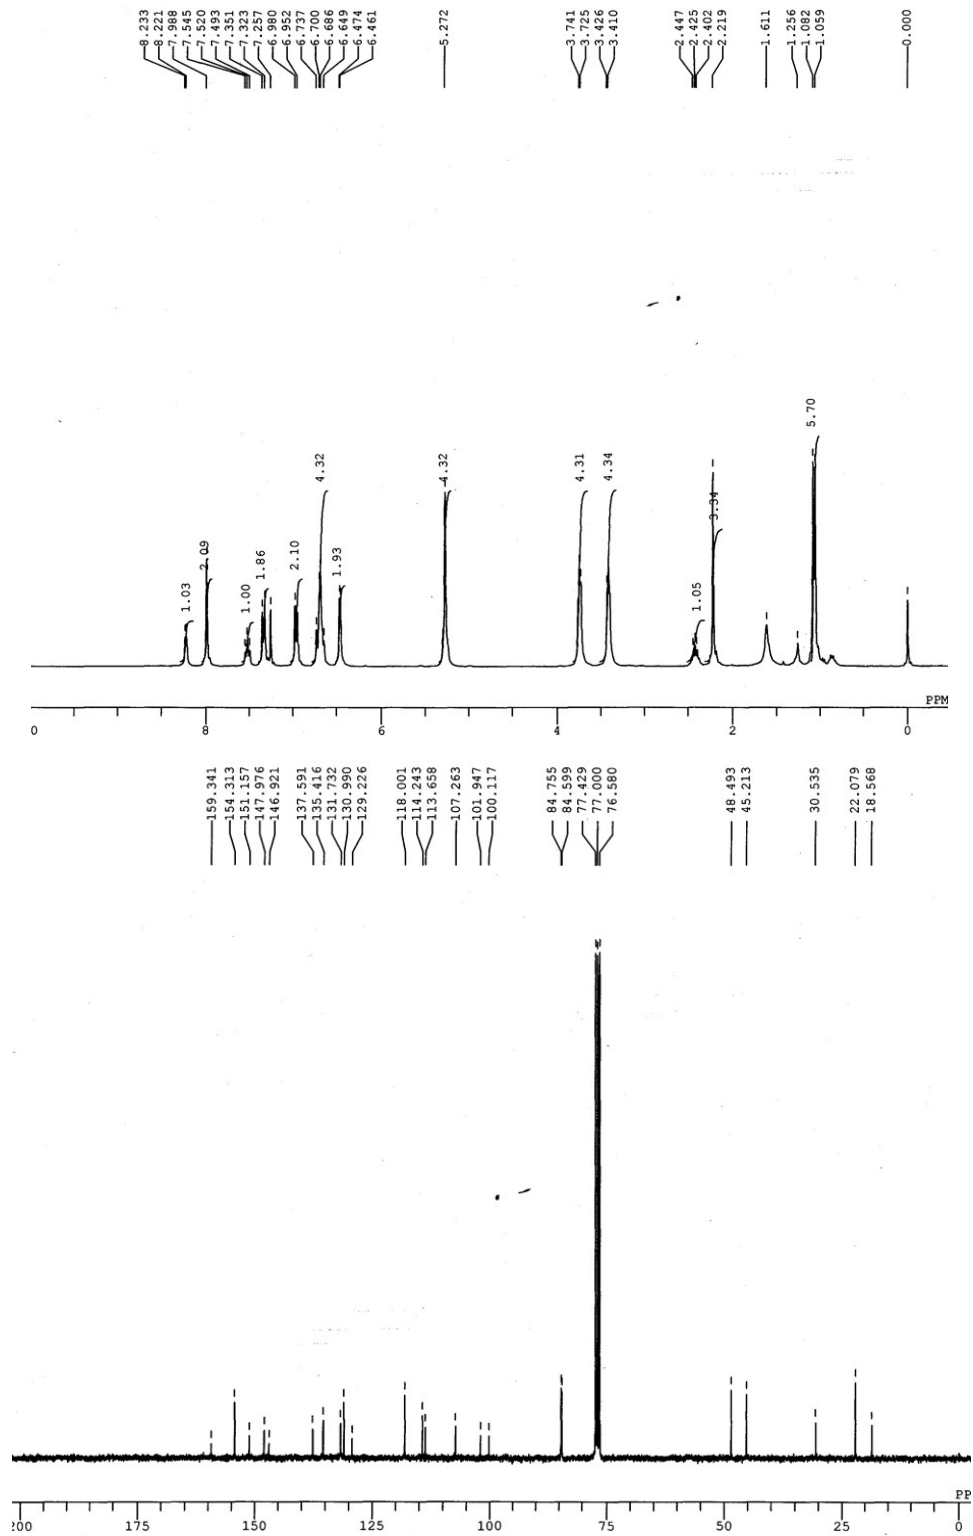

Fig. S6 <sup>1</sup>H (top) and <sup>13</sup>C NMR (bottom) spectra of **4** in CDCl<sub>3</sub>.

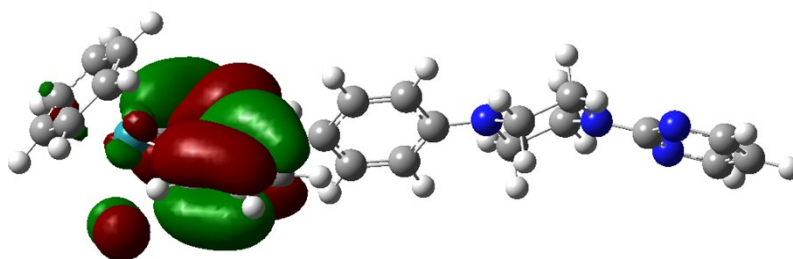

(a)

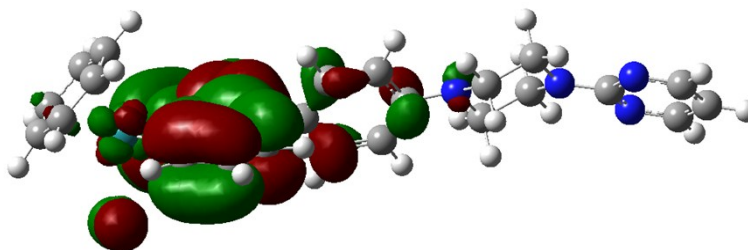

(b)

**Fig. S7** HOMO (a) LUMO (b) diagram of complex 1.

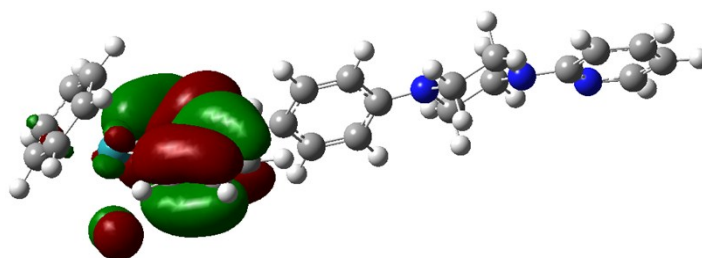

(a)

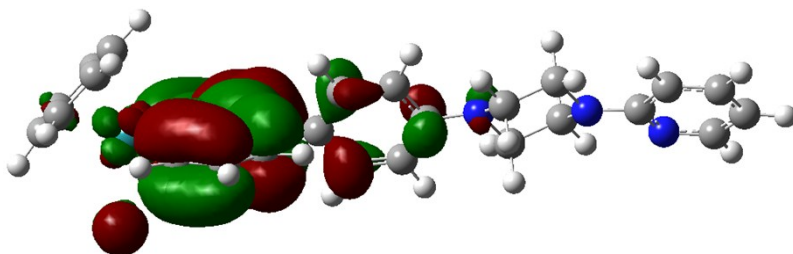

(b)

**Fig. S8** HOMO (a) LUMO (b) diagram of complex 2.



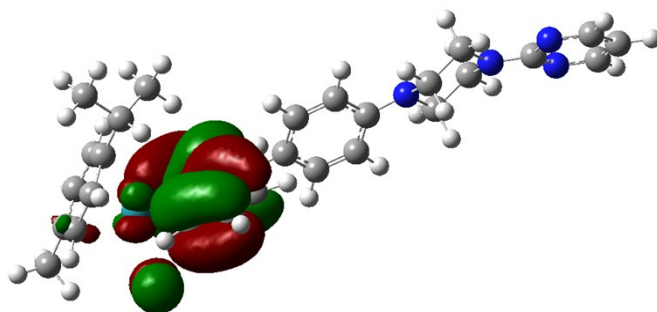

(a)

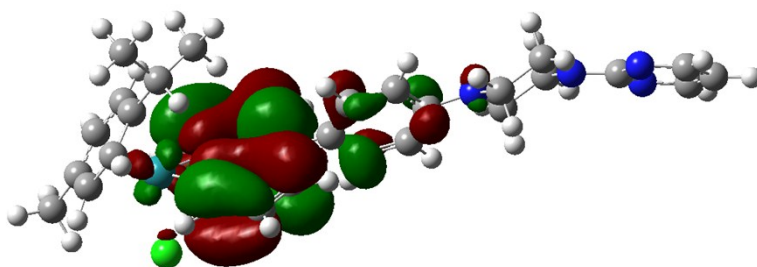

(b)

**Fig. S9** HOMO (a) LUMO (b) diagram of complex 3.

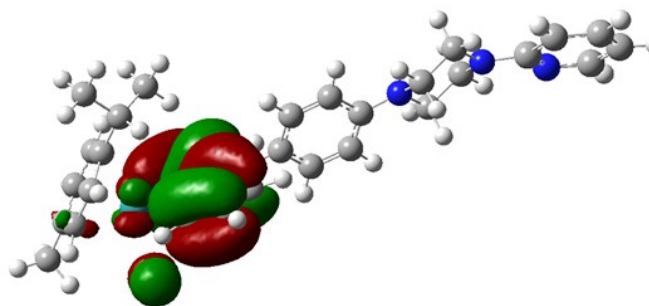

(a)

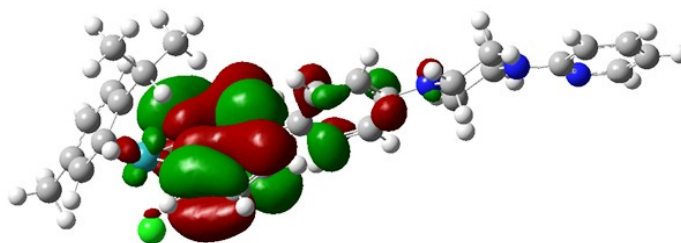

(b)

**Fig. S10** HOMO (a) LUMO (b) diagram of complex 4.

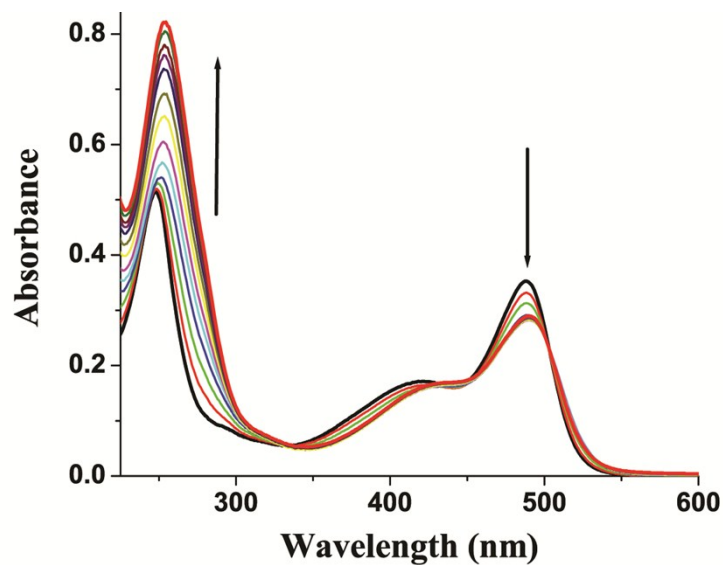

(a)

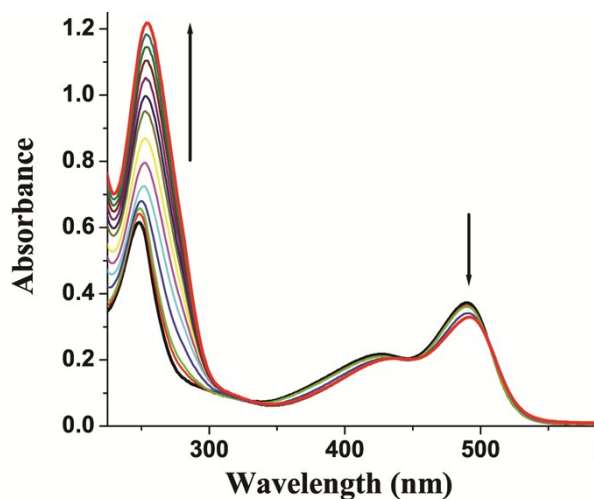

(b)

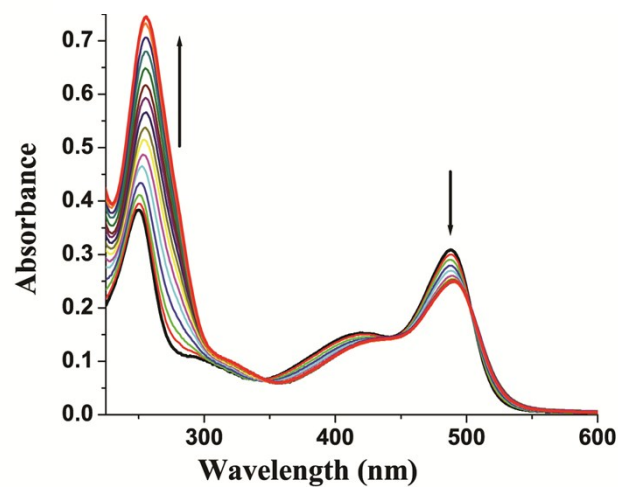

(c)

**Fig. S11** Absorption titration spectra of **1** (a), **2** (b) and **4** (d) in EtOH:H<sub>2</sub>O (1:1) with an increase in molar ratio of CT DNA to complex (1–30  $\mu$ M) at rt. Arrow shows the absorbance changes upon increasing CT DNA concentration.

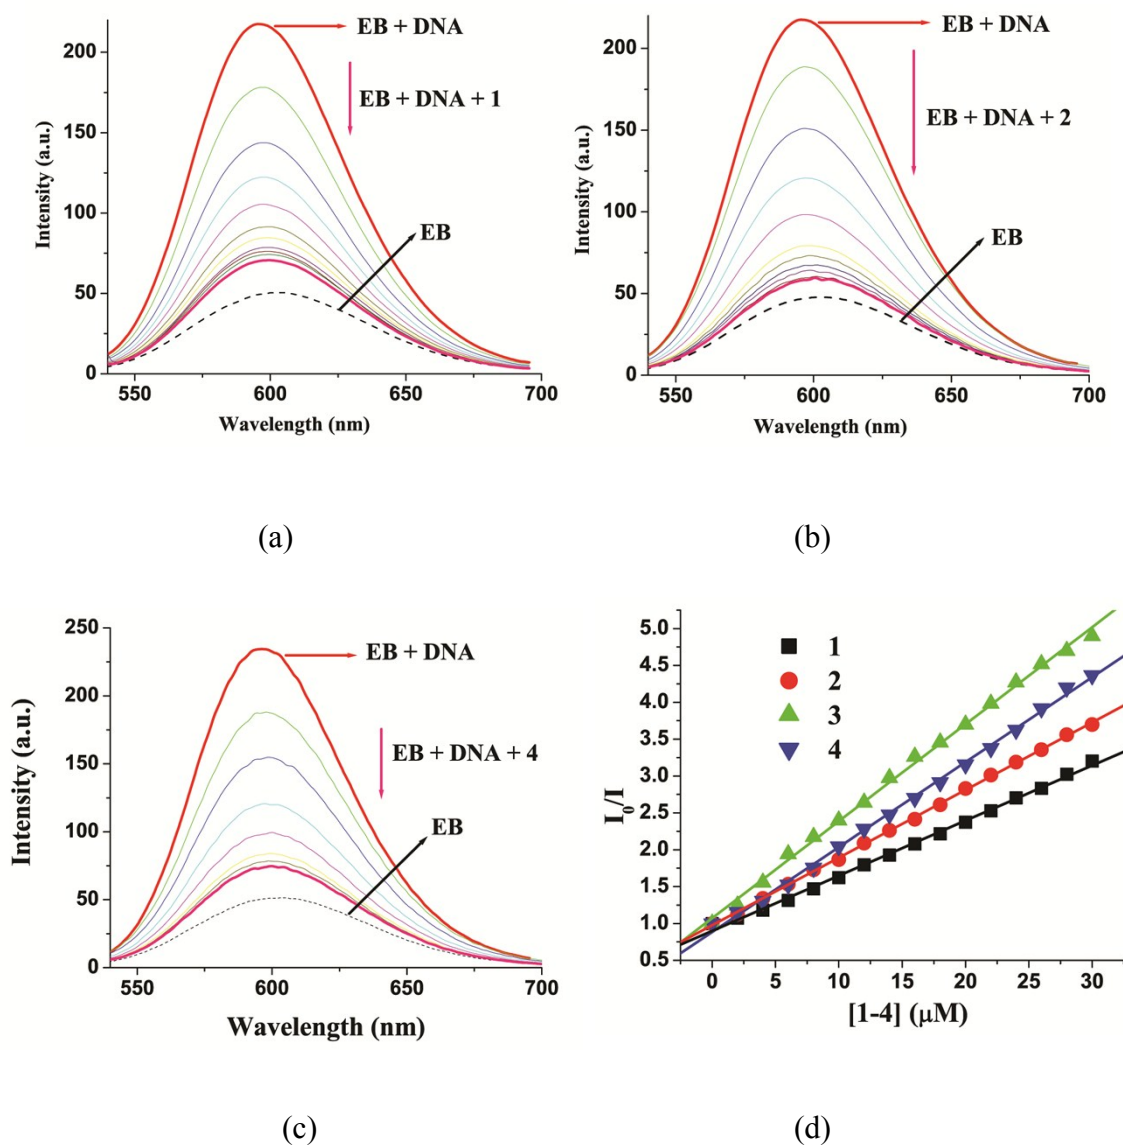

**Fig. S12** Emission spectra of EB bound to the DNA in the absence (---) and in the presence of **1** (a), **2** (b) and **4** (c).  $[\text{EB}] = 10 \mu\text{M}$ ,  $[\text{DNA}] = 10 \mu\text{M}$ ,  $[\mathbf{1}, \mathbf{2} \text{ and } \mathbf{4}] = 0\text{--}50 \mu\text{M}$ . Arrow shows changes in the emission intensity upon addition of increasing complex concentration. Stern–Volmer plots of the EtBr-DNA fluorescence titration for complexes **1–4** (d).

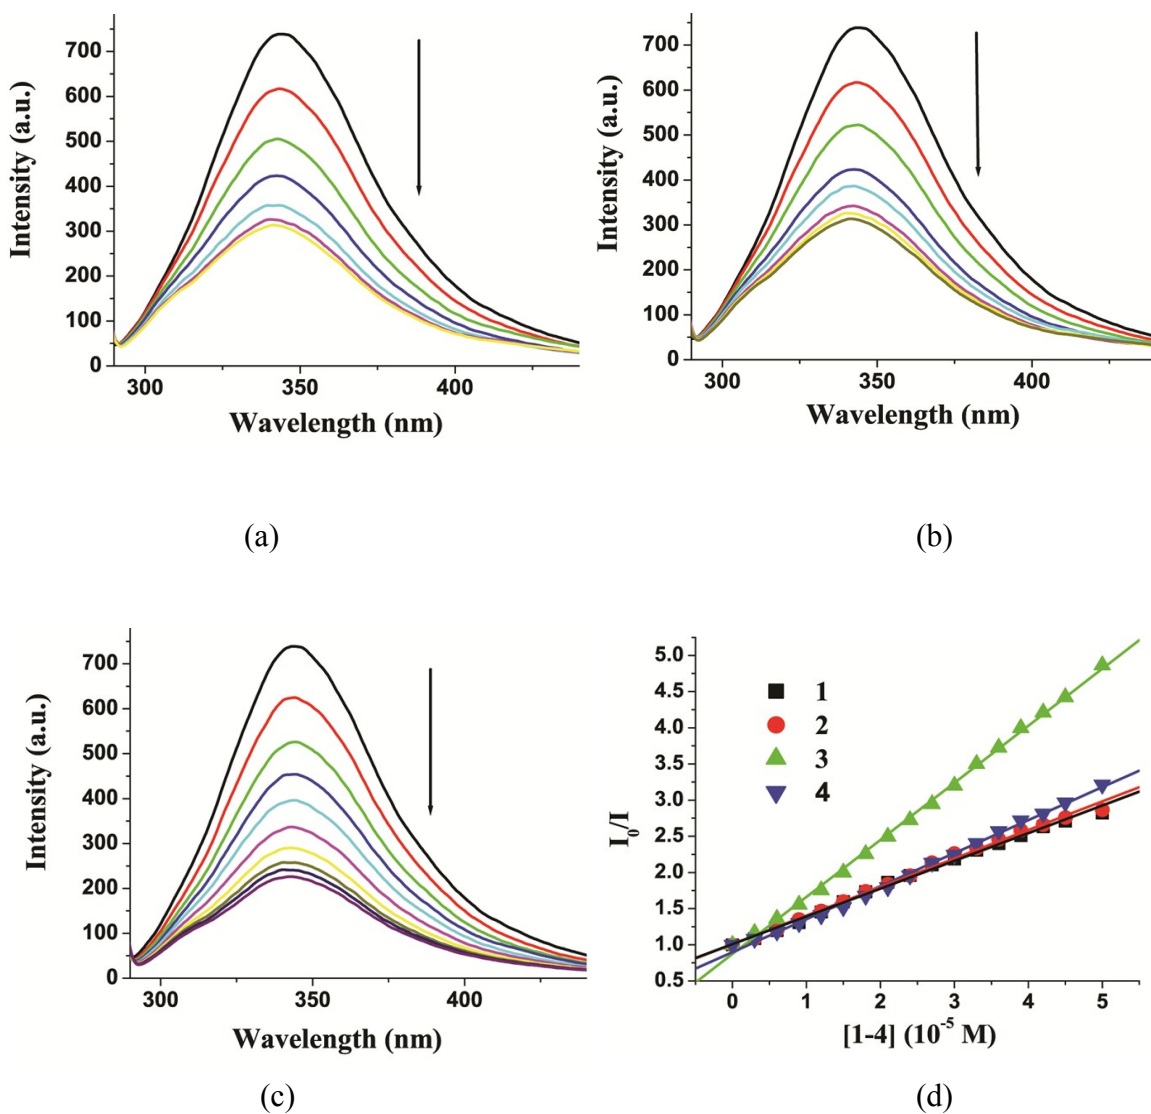

**Fig. S13** Emission spectrum of BSA (0.5  $\mu\text{M}$ ;  $\lambda_{\text{ex}} = 280$  nm;  $\lambda_{\text{em}} = 343$  nm) in the presence of increasing amounts of complexes **1** (a), **2** (b) and **4** (c) (0–50  $\mu\text{M}$ ). Stern–Volmer plots of the fluorescence titrations of **1–4** (d).

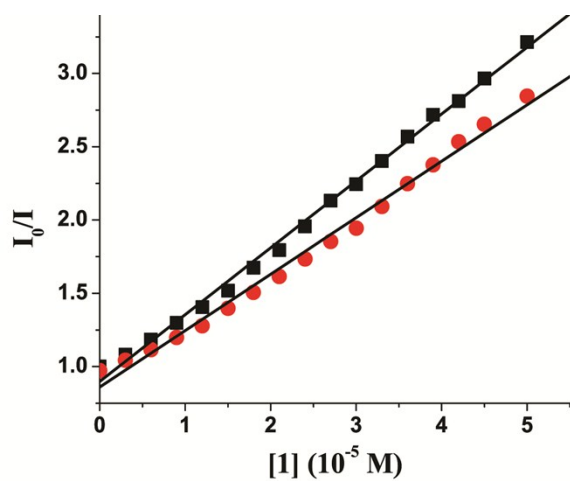

(a)

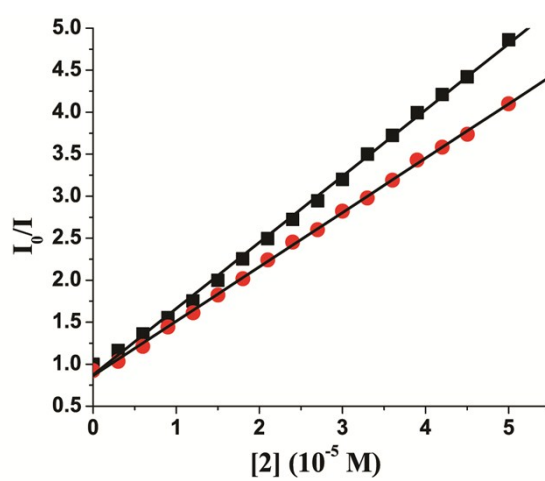

(b)

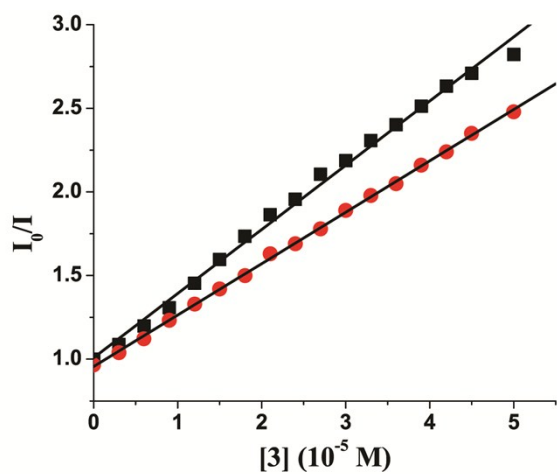

(c)

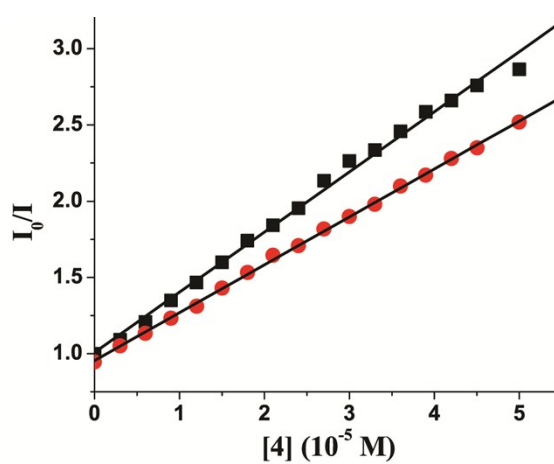

(d)

**Fig. S14** Stern-Volmer plot for quenching of complexes **1** (a), **2** (b), **3** (c) and **4** (d) to BSA at 300 (black) and 310 K (red).

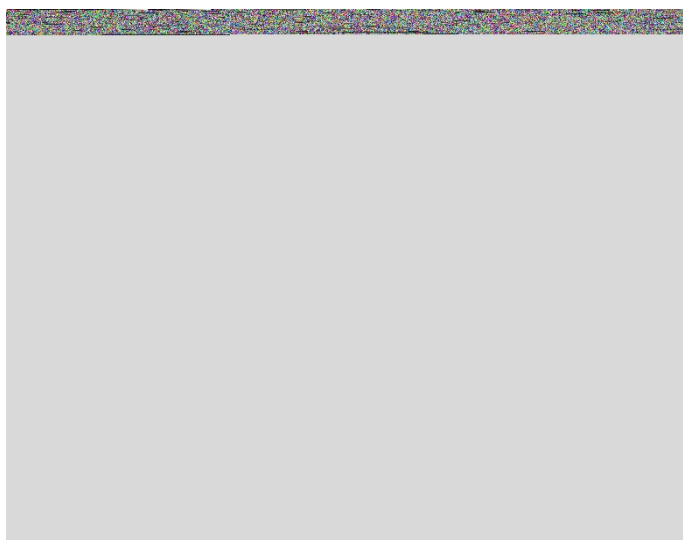

(a)

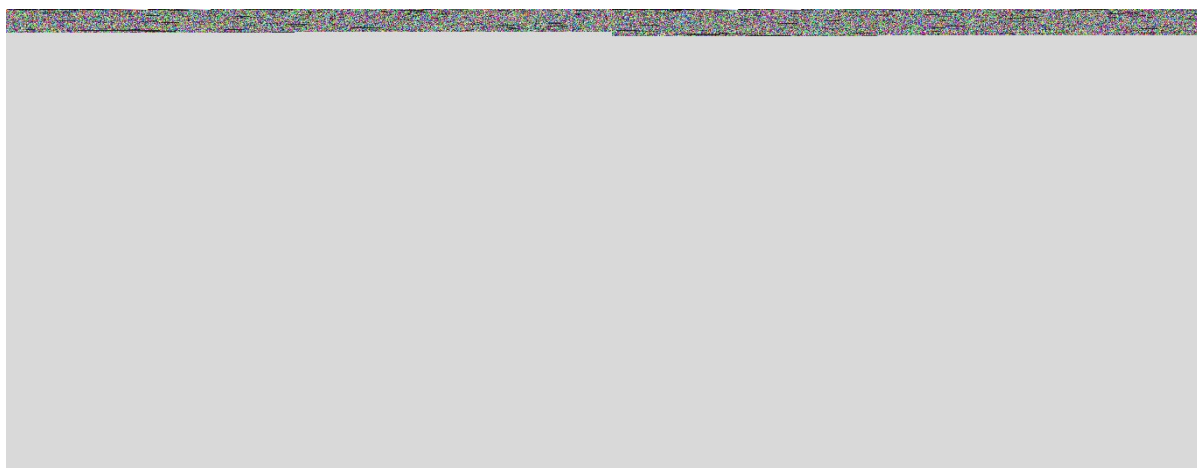

(b)

(c)

**Fig. S15** Synchronous spectra of BSA ( $0.5 \mu\text{M}$ ) in the presence of increasing amounts of complexes **1** (a), **2** (b) and **4** (c) ( $0\text{--}50 \mu\text{M}$ ) in the wavelength difference of  $\Delta\lambda = 60 \text{ nm}$ . Arrows show the emission intensity decrease accompanied by blue shift upon the increasing concentration of complexes **1**, **2** and **4**.

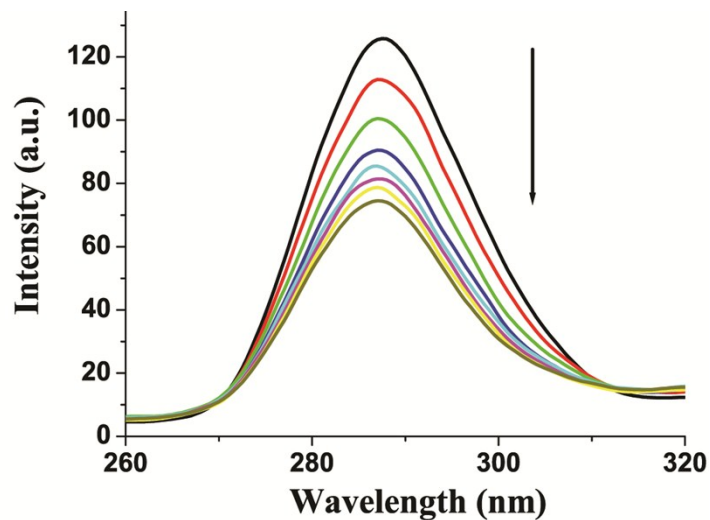

(a)

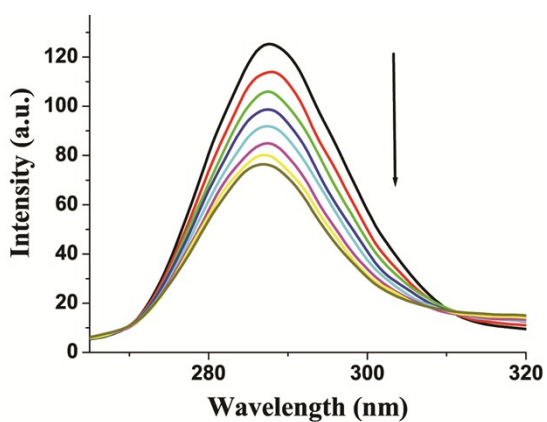

(b)

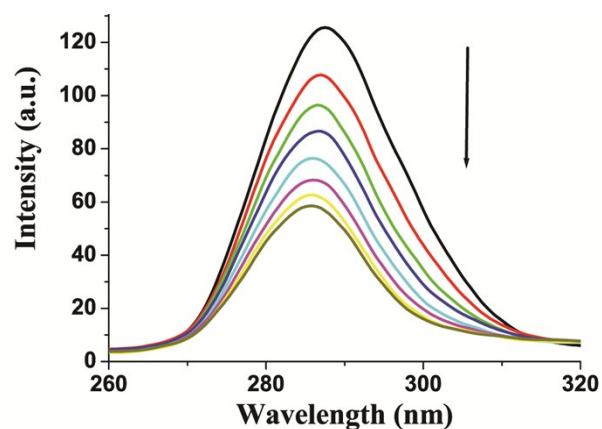

(c)

**Fig. S16** Synchronous spectra of BSA ( $0.5 \mu\text{M}$ ) in the presence of increasing amounts of complexes **1** (a), **2** (b) and **4** (c) ( $0\text{--}50 \mu\text{M}$ ) in the wavelength difference of  $\Delta\lambda = 15 \text{ nm}$ . Arrows show the emission intensity decrease accompanied by blue shift upon the increasing concentration of complexes **1**, **2** and **4**.

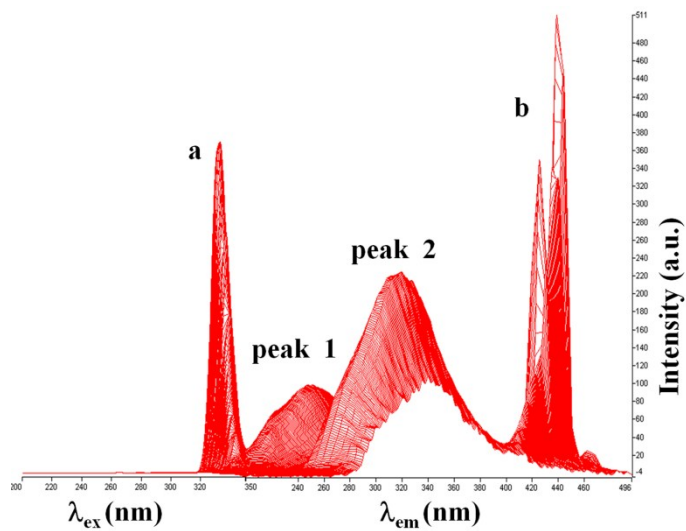

(a)

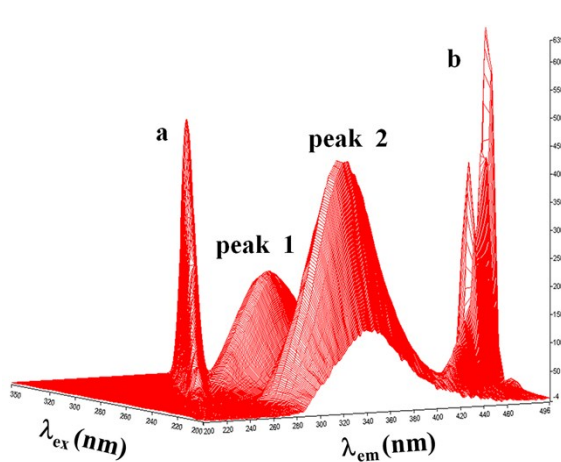

(b)

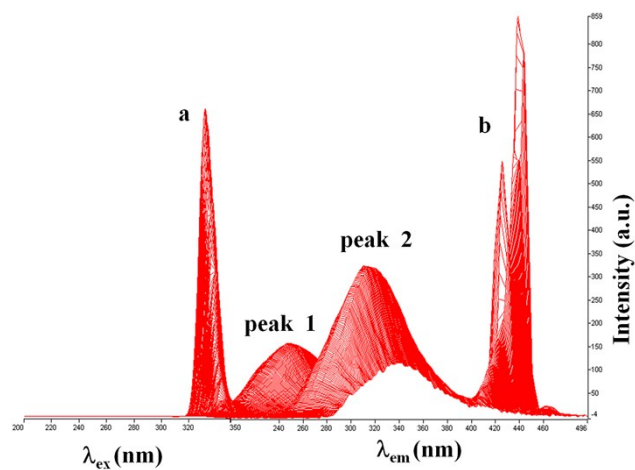

(c)

**Fig. S17** The 3D fluorescence spectra of BSA + **1** (a), BSA + **2** (b), BSA + **4** (c).  $c(\text{BSA}) = 2 \times 10^{-6} \text{ molL}^{-1}$ ,  $c(\mathbf{1}, \mathbf{2} \text{ and } \mathbf{4}) = 2 \times 10^{-6} \text{ molL}^{-1}$ .



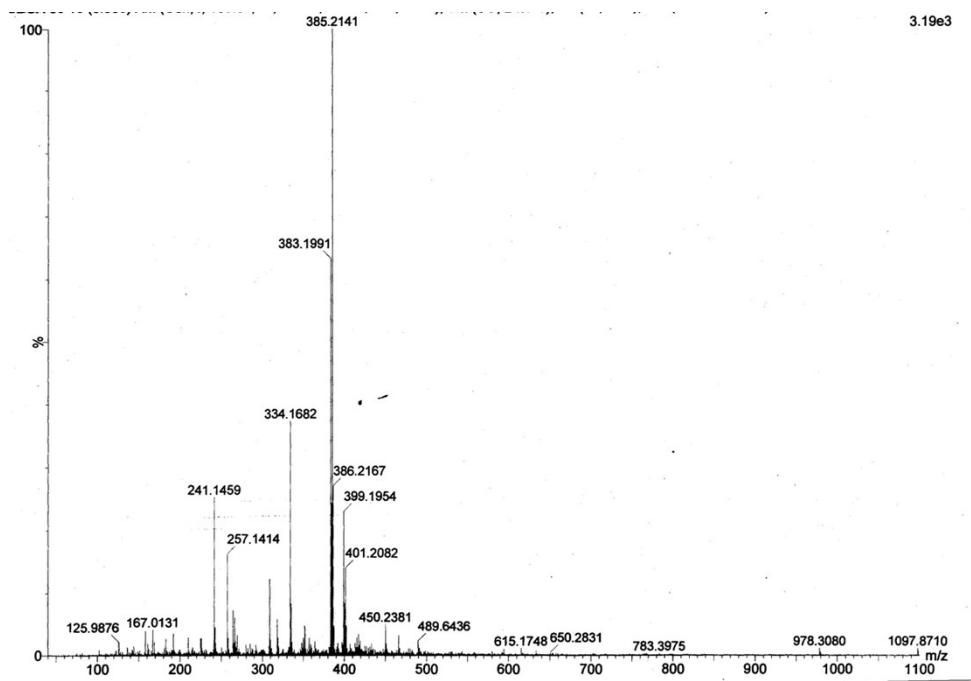

Fig. S18 ESI-MS spectra of pmpzdpH.

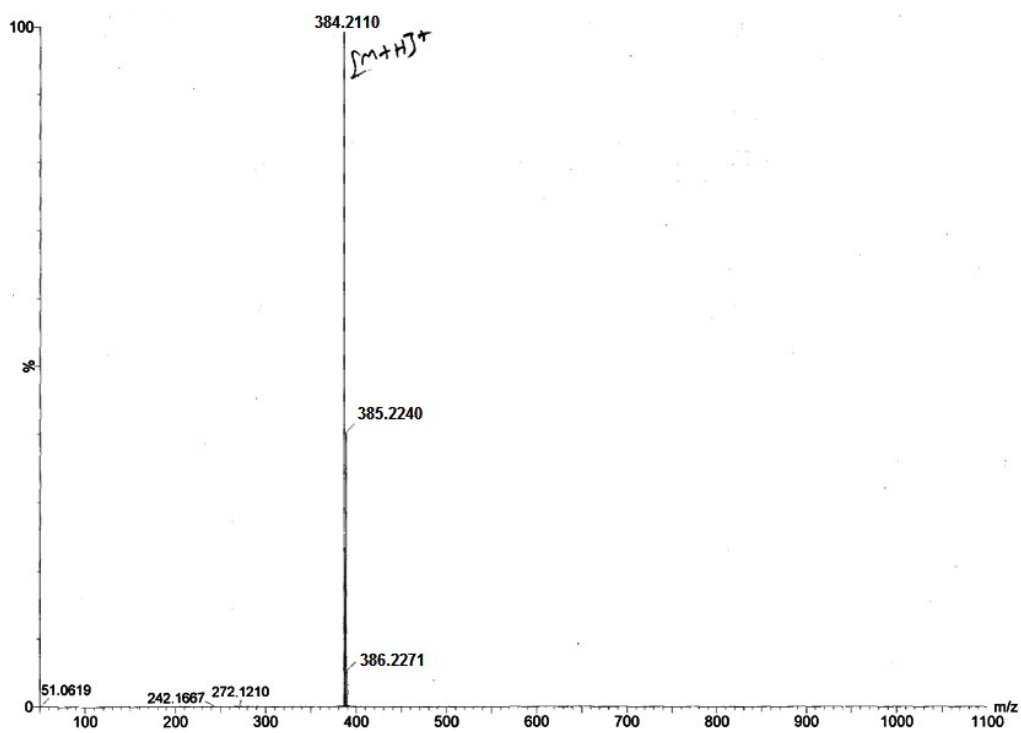

Fig. S19 ESI-MS spectra of pypzdpH.

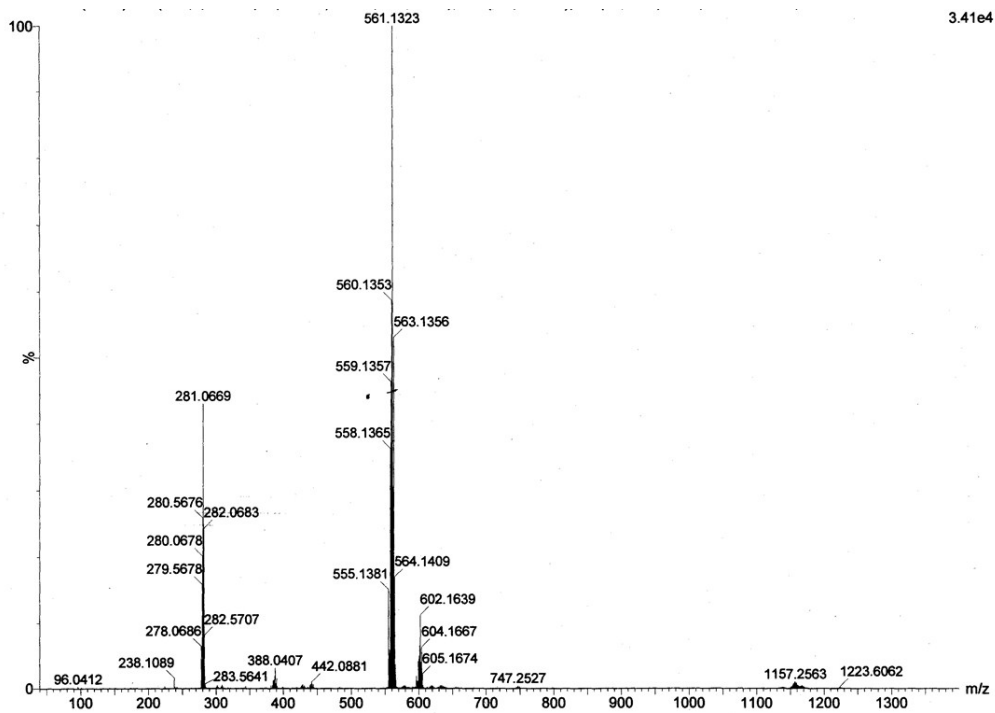

Fig. S20 ESI-MS spectra of 1.

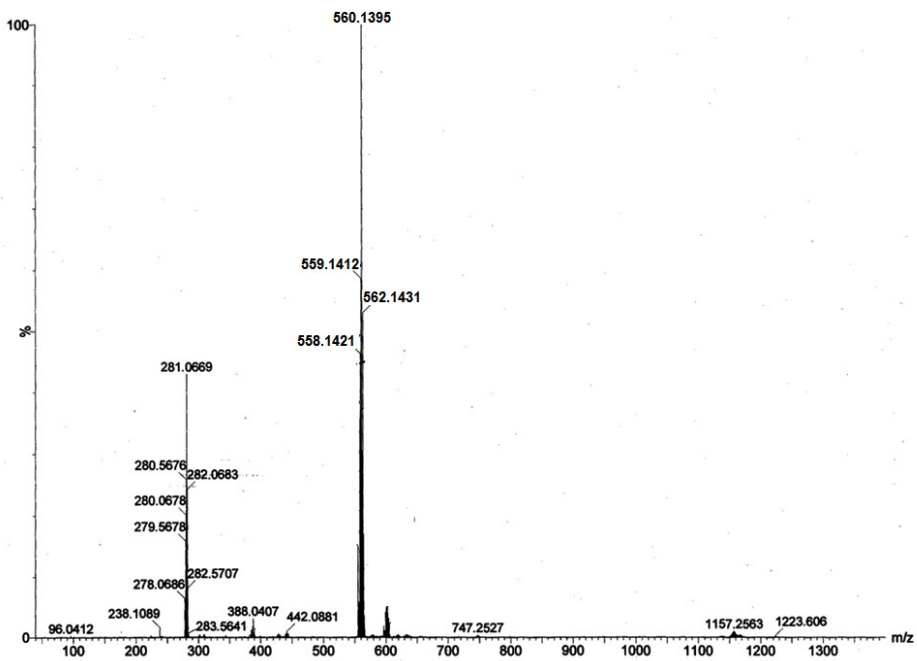

Fig. S21 ESI-MS spectra of 2.

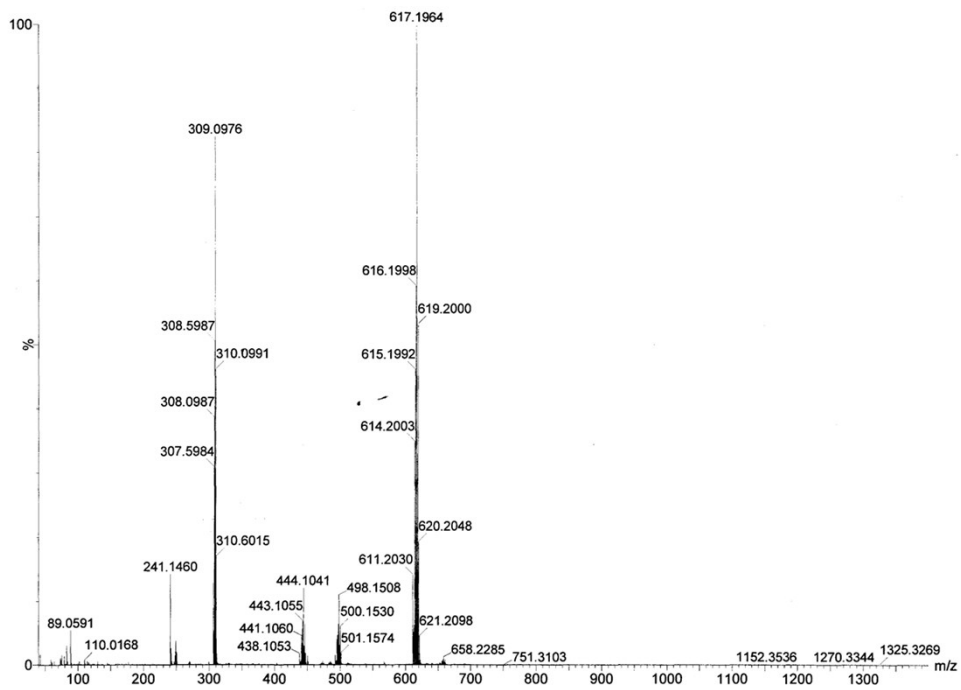

Fig. S22 ESI-MS spectra of 3.

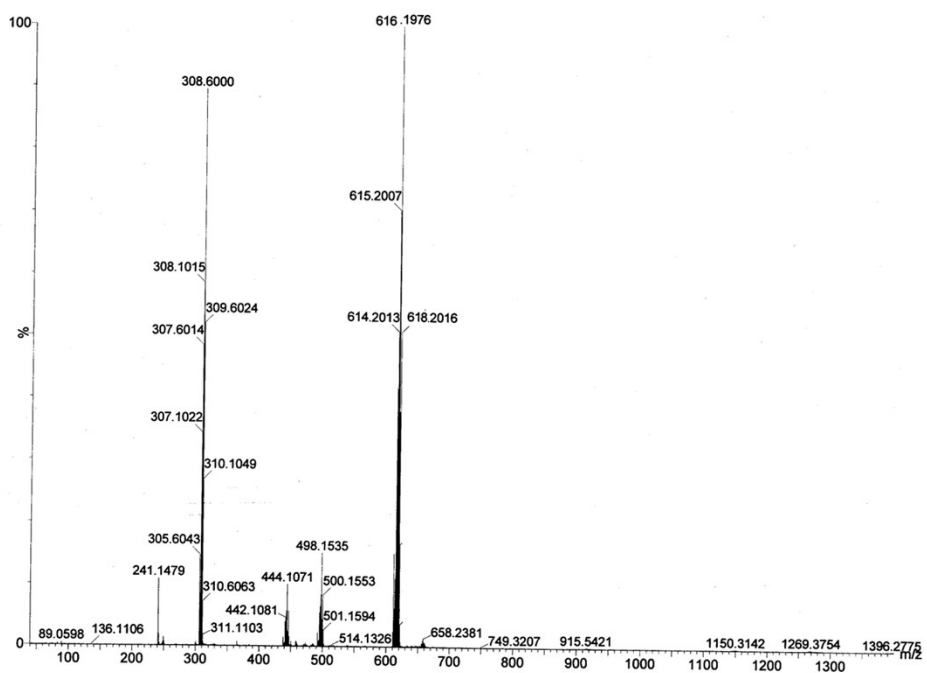

Fig. S23 ESI-MS spectra of 4.

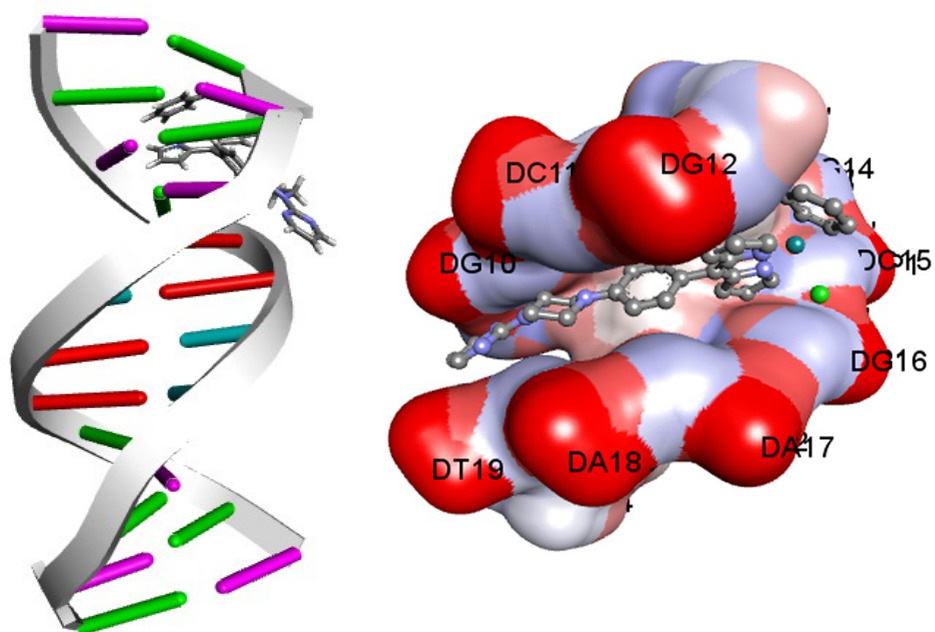

**Fig. S24** Molecular docked model of complex 1 with DNA (PDB ID: 1BNA).

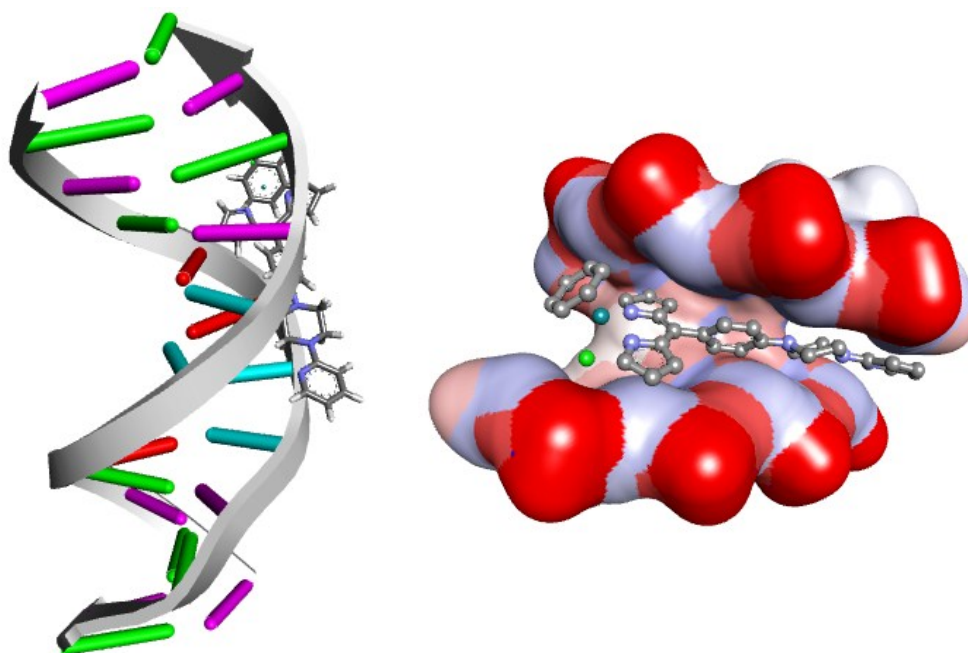

**Fig. S25** Molecular docked model of complex 2 with DNA (PDB ID: 1BNA).

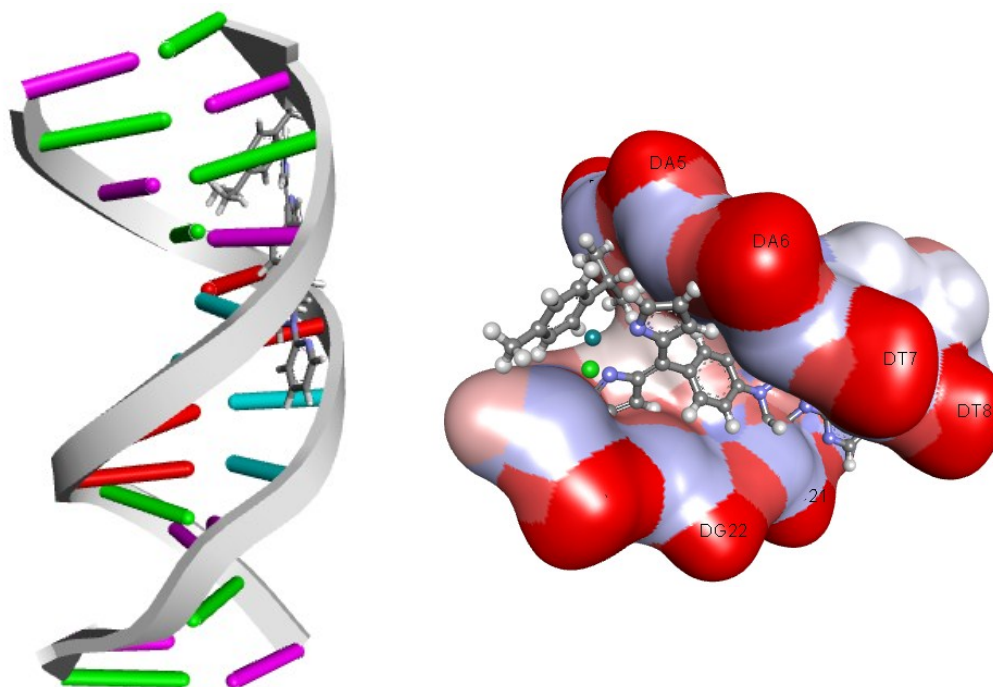

**Fig. S26** Molecular docked model of complex 4 with DNA (PDB ID: 1BNA).

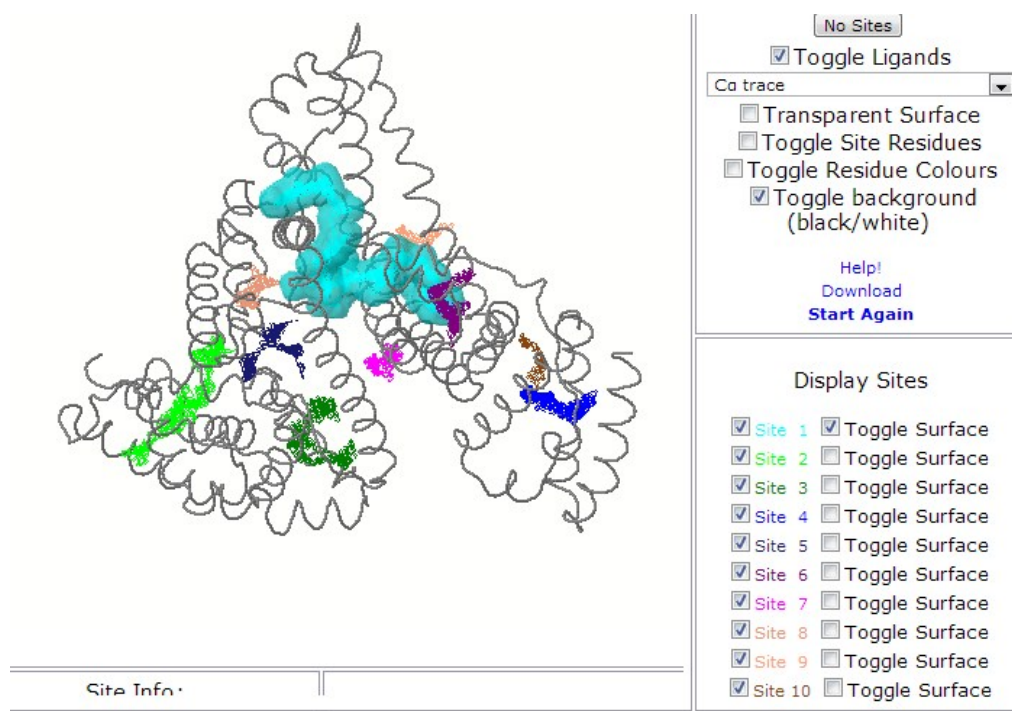

**Fig. S27** Most probable 10 (ten) binding sites of HSA (PDBID: 1h9z).

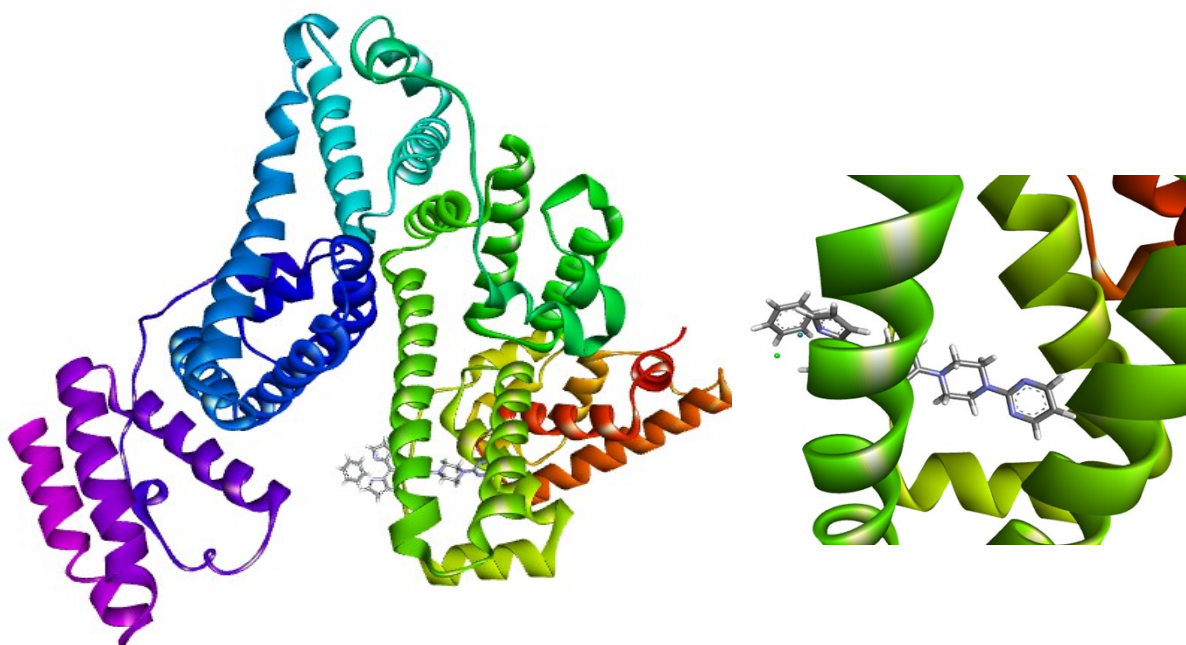

(a)

(b)

**Fig. S28** Molecular docked model of **1** located within the hydrophobic pocket of HSA (a) (PDB ID: 1h9z) (b) the interaction mode between **1** (stick) and HSA (cartoon).

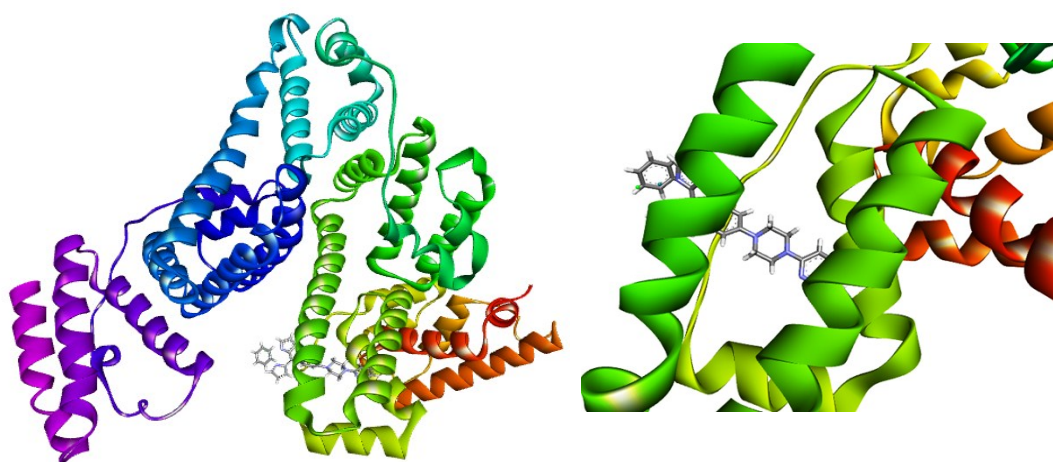

(a)

(b)

**Fig. S29** Molecular docked model of **2** located within the hydrophobic pocket of HSA (a) (PDB ID: 1h9z) (b) the interaction mode between **2** (stick) and HSA (cartoon).

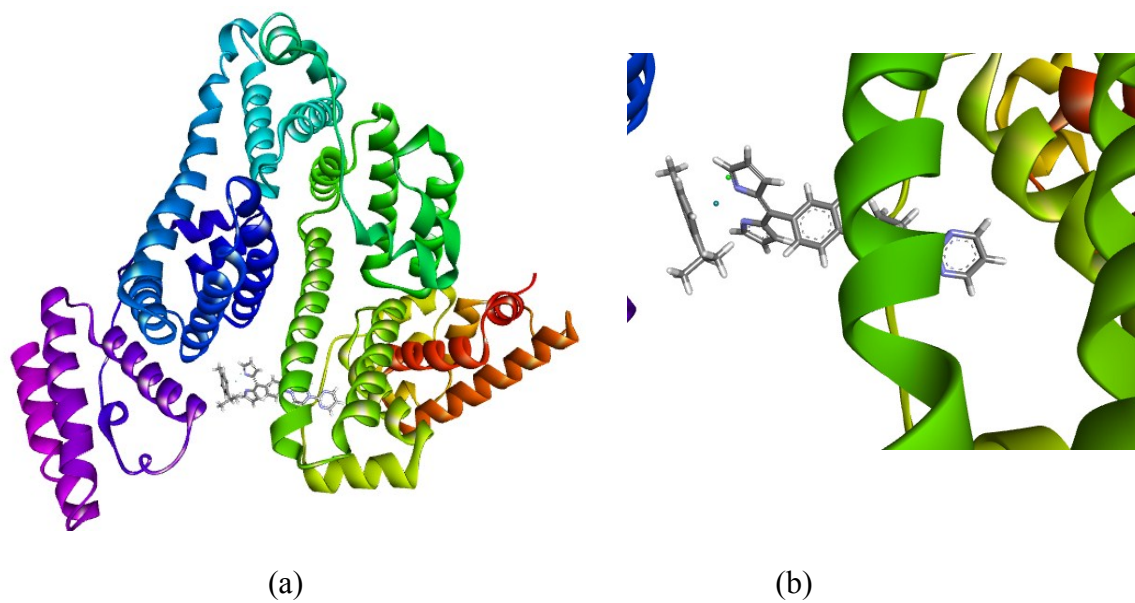

**Fig. S30** Molecular docked model of **4** located within the hydrophobic pocket of HSA (a) (PDB ID: 1h9z) (b) the interaction mode between **4** (stick) and HSA (cartoon).

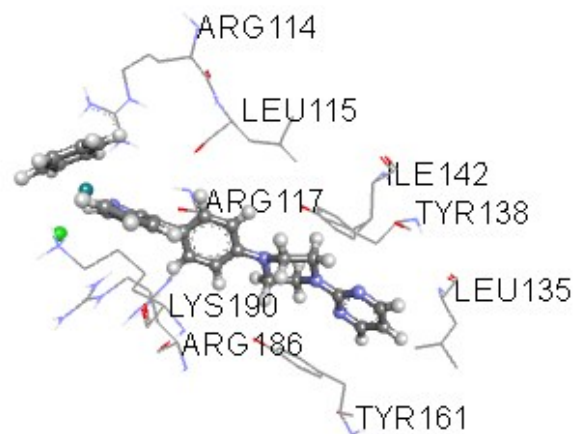

**Fig. S31** Interaction of complex 1 with HSA subdomain IIA.

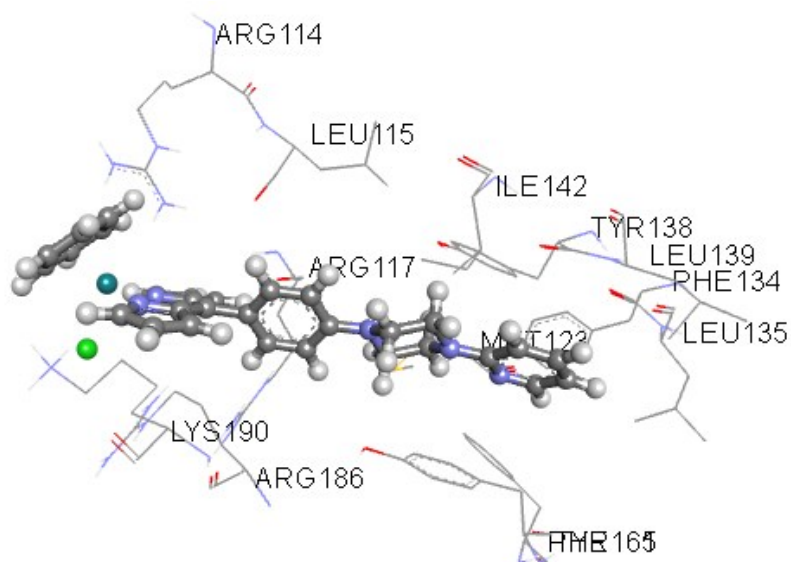

**Fig. S32** Interaction of complex 2 with HSA subdomain IIA.



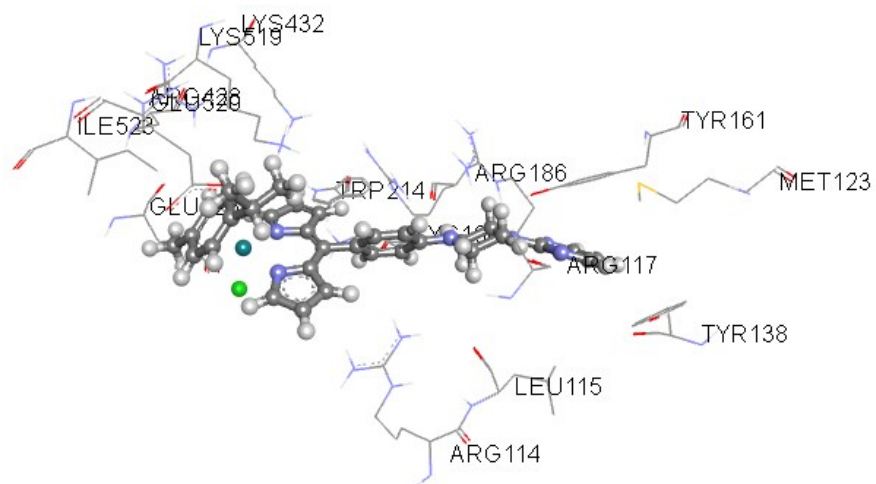

**Fig. S33** Interaction of complex **3** with HSA subdomain IIA.

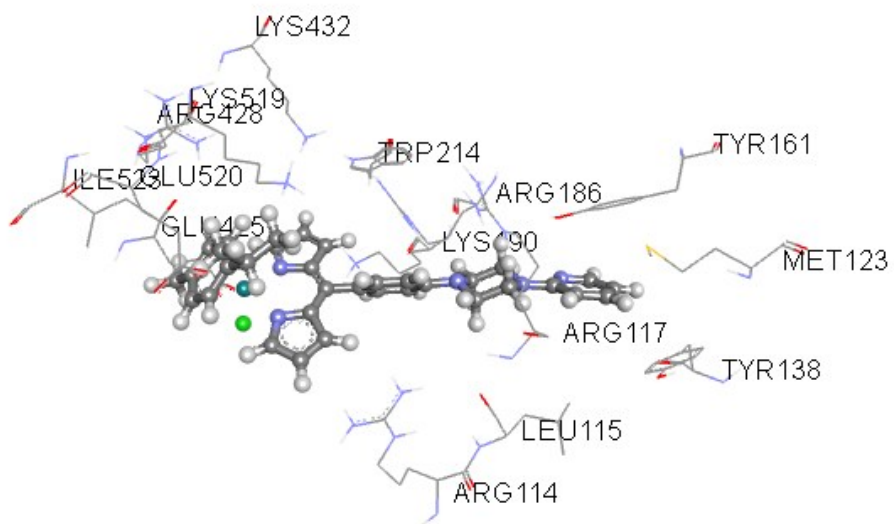

**Fig. S34** Interaction of complex 4 with HSA subdomain IIA.

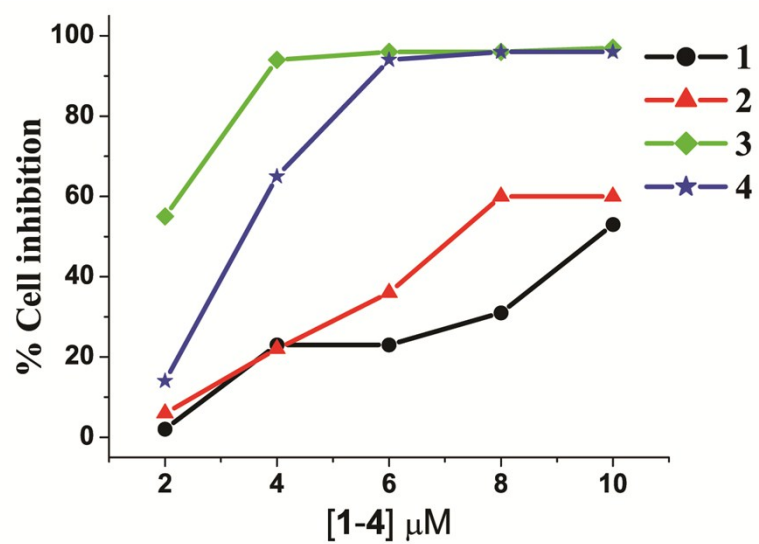

**Fig. S35** MTT assay: Cells were treated with 2.0, 4.0, 6.0, 8.0 and 10.0 μM of 1–4 and percentage cell death plotted against different concentration of 1–4.

**Table**

| <b>Bond length (Å)</b> | <b>1</b> | <b>2</b> | <b>3</b> | <b>4</b> |
|------------------------|----------|----------|----------|----------|
| Ru-N1                  | 2.074    | 2.074    | 2.076    | 2.07     |
| Ru-N2                  | 2.080    | 2.081    | 2.086    | 2.08     |
| Ru-Cl1                 | 2.424    | 2.423    | 2.434    | 2.40     |
| Ru-Cg                  | 1.775    | 1.776    | 1.773    | 1.774    |
| Ru-Cav                 | 2.272    | 2.275    | 2.276    | 2.278    |
| <b>Bond Angle (°)</b>  |          |          |          |          |
| N2-Ru1-N1              | 92.58    | 92.58    | 92.58    | 92.58    |
| N2-Ru1-Cl1             | 91.53    | 91.53    | 91.53    | 91.53    |
| N1-Ru1-Cl1             | 90.32    | 90.32    | 90.32    | 90.32    |
| $\omega$               | 69.70    | 69.70    | 69.70    | 69.70    |

**S1**

Selected bond lengths (Å) and bond angles (°) from DFT calculated structure of **1–4**.

**Table S2** HOMO and LUMO energy for complexes **1–4** calculated by DFT method.

| <b>Complexes</b> | <b>HOMO (ev)</b> | <b>LUMO (ev)</b> |
|------------------|------------------|------------------|
| <b>1</b>         | -5.130           | -1.924           |
| <b>2</b>         | -5.142           | -1.932           |
| <b>3</b>         | -5.073           | -1.862           |
| <b>4</b>         | -5.066           | -1.852           |

**Table S3**

**Absorption Spectral Properties of 1–4 Bound to CT DNA.**

| Complexes | $\lambda_{\max}$ (nm) | Changes in absorbance | $\Delta\varepsilon$<br>$M^{-1}cm^{-1}$ | Red/blue shift<br>(nm) | $K_b$ ( $M^{-1}$ ) | Site<br>Size ( <i>s</i> ) |
|-----------|-----------------------|-----------------------|----------------------------------------|------------------------|--------------------|---------------------------|
| <b>1</b>  | 249                   | hyperchromism         | 0.428                                  | 2                      | $9.5 \times 10^4$  | 0.14                      |
|           | Complexes             | Temperature           | $K_q$ ( $M^{-1}$ )                     | $K_{bin}$ ( $M^{-1}$ ) |                    |                           |
|           | 427                   | hypochromism          | 0.020                                  | Insignificant          |                    |                           |
|           | 489                   | hypochromism          | 0.04                                   | 2                      |                    |                           |
| <b>2</b>  | 248                   | hyperchromism         | 0.608                                  | 2                      | $7.6 \times 10^4$  | 0.15                      |
|           | 425                   | hypochromism          | 0.010                                  | Insignificant          |                    |                           |
|           | 490                   | hypochromism          | 0.030                                  | 2                      |                    |                           |
| <b>3</b>  | 250                   | hyperchromism         | 0.370                                  | 4                      | $6.9 \times 10^5$  | 0.15                      |
|           | 422                   | hypochromism          | 0.028                                  | Insignificant          |                    |                           |
|           | 488                   | hyperchromism         | 0.069                                  | 2                      |                    |                           |
| <b>4</b>  | 250                   | hyperchromism         | 0.362                                  | 4                      | $6.5 \times 10^5$  | 0.15                      |
|           | 422                   | hypochromism          | 0.021                                  | Insignificant          |                    |                           |
|           | 488                   | Hypochromism          | 0.063                                  | 2                      |                    |                           |

**Table S4** Quenching constant ( $K_q$ ), binding constant ( $K_{bin}$ ) and number of binding sites (*n*) for the interactions of complexes with BSA

|          |     |                    |                    |      |        |
|----------|-----|--------------------|--------------------|------|--------|
| <b>1</b> | 298 | $1.94 \times 10^4$ | $2.49 \times 10^4$ | 0.95 | 0.9984 |
|          | 308 | $1.23 \times 10^4$ | $2.12 \times 10^4$ |      | 0.9987 |
| <b>2</b> | 298 | $3.32 \times 10^4$ | $4.49 \times 10^4$ | 0.97 | 0.9989 |
|          | 308 | $3.02 \times 10^4$ | $4.31 \times 10^4$ |      | 0.9969 |
| <b>3</b> | 298 | $6.45 \times 10^5$ | $9.23 \times 10^5$ | 1.01 | 0.9991 |
|          | 308 | $6.21 \times 10^5$ | $9.02 \times 10^5$ |      | 0.9989 |
| <b>4</b> | 298 | $2.30 \times 10^5$ | $4.43 \times 10^5$ | 1.02 | 0.9983 |
|          | 308 | $2.15 \times 10^5$ | $4.29 \times 10^5$ |      | 0.9989 |

**Table S5.** Characteristic 3D fluorescence spectral parameters of the BSA and BSA + **1–4**

| Complex | Peaks |
|---------|-------|
|---------|-------|

|            | Rayleigh Peaks<br>[ $\lambda_{\text{ex}}/\lambda_{\text{em}}$<br>(nm/nm)] | Peak 1<br>[ $\lambda_{\text{ex}}/\lambda_{\text{em}}$ (nm/nm)] | Intensity | Peak 2<br>[ $\lambda_{\text{ex}}/\lambda_{\text{em}}$<br>(nm/nm)] | Intensity |
|------------|---------------------------------------------------------------------------|----------------------------------------------------------------|-----------|-------------------------------------------------------------------|-----------|
| <b>BSA</b> | 270/270 →<br>350/350                                                      | 280/340                                                        | 264       | 223/342                                                           | 653       |
| <b>1</b>   | 270/270 →<br>350/350                                                      | 280/340                                                        | 102       | 221/340                                                           | 304       |
| <b>2</b>   | 270/270 →<br>350/350                                                      | 280/340                                                        | 126       | 221/340                                                           | 397       |
| <b>3</b>   | 270/270 →<br>350/350                                                      | 280/340                                                        | 80        | 221/340                                                           | 214       |
| <b>4</b>   | 270/270 →<br>350/350                                                      | 280/340                                                        | 95        | 221/340                                                           | 275       |

**Table S6** Log  $P$  Values for Complexes 1-4<sup>a</sup>

|         |
|---------|
| Log $P$ |
|---------|

| Complex                                                                                                   | Mean                                                                                                                                       | SD   |
|-----------------------------------------------------------------------------------------------------------|--------------------------------------------------------------------------------------------------------------------------------------------|------|
| <b>1</b>                                                                                                  | 1.26                                                                                                                                       | 0.02 |
| SITE 1                                                                                                    | LYS 195, GLN 196, LEU 198, LYS 199, SER 202, LEU 203, PHE 206, GLY 207, GLU 208, ARG 209, ARG 209, ALA 210, PHE 211, LYS 212, ALA 213, TRP |      |
| <b>2</b>                                                                                                  | 1.23                                                                                                                                       | 0.02 |
| <b>3</b>                                                                                                  | 1.32                                                                                                                                       | 0.01 |
| <b>4</b>                                                                                                  | 1.30                                                                                                                                       | 0.02 |
| <sup>a</sup> Results are the means of three independent experiments and are expressed as means $\pm$ SDs. |                                                                                                                                            |      |

**Table S7** 5 most probable binding sites of HSA (PDB ID: 1h9z; Q-site finder) and preferential binding site of complexes from docked structure.



|          |                                                                                                                                                                                                                                                                                                                                                                                                                                                                                                                                                                                  |
|----------|----------------------------------------------------------------------------------------------------------------------------------------------------------------------------------------------------------------------------------------------------------------------------------------------------------------------------------------------------------------------------------------------------------------------------------------------------------------------------------------------------------------------------------------------------------------------------------|
|          | 214, VAL 216, ARG 218, GLN 221, VAL 235, HIS 242, ASN 295 LYS 323, ASP 324, LEU 327, GLY 328, LEU 331, PRO 339, TYR 341, SER 342, VAL 343, VAL 344, LEU 345, LEU 346, LEU 347, ARG 348, ALA 350, LYS 351, GLU 354, GLU 383, Pro 384, LEU 397, ILE 388, LYS 389, ASN 391, CYS 392, PHE 395, PHE 403, LEU 407, ARG 410, TYR 411, LEU 430, GLY 431, Val 433, GLY 434, CYS 437, CYS 438, ARG 445, MET 446, PRO 447, CYS 448, ALA 449, GLU 450, ASP 451, LEU 453, SER 454, VAL 455, LEU 457, VAL 455, LEU 457, ASN 458, SER 480, LEU 481, VAL 482, ARG 484, ARG 485, PRO 486, SER 489 |
| SITE 2   | VAL 7, ARG 10, LEU 14, PHE 19, LEU 22, VAL 23, ALA 26, PHE 27, TYR 30, GLU 45, VAL 46, PHE 49 ASN 61, LEU 66, HIS 67, THR 68, LEU 69, PHE 70, ASP 72, LYS 73, THR 76, ASN 99, LRU 103, TYR 150, ALA 151, PRO 152, GLY 248, ASP 249, LEU 250, LEU 251, ALA 254, ASP 255, ARG 257, ALA 258, ALA 261, LEU 283, LEU 284, GLU 285, LYS 286, SER 287, HIS 288                                                                                                                                                                                                                          |
| SITE 3   | LEU 115, VAL 116, ARG 117, PRO 118, MET 123, PHE 134, LEU 135, TYR 138, LEU 139, ILE 142, HIS 146, PHE 149, LEU 154, PHE 157, ALA 158, TYR 161, LYS 162, PHE 165, LEU 182, ASP 183, LEU 185, ARG 186, GLY 189, LYS 190, SER 193                                                                                                                                                                                                                                                                                                                                                  |
| SITE 4   | TYR 401, ASN 405, PHE 502, PHE 507, PHE 509, LYS 524, LYS 525, GLN 526, ALA 528, LEU 529, LEU 532, HIS 535, LYS 536, VAL 547, MET 548, PHE 551, ALA 552, LEU 575, VAL 576, SER 579, GLN 580                                                                                                                                                                                                                                                                                                                                                                                      |
| SITE 5   | GLN 29, LYS 106, ASP 108, HIS 146, PRO 147, TYR 148, PHE 149, TYR 150, ALA 151, GLU 153, SER 192, SER 193, ALA 194, LYS 195, GLN 196, ARG 197, LYS 199, CYS 200, ALA 201, HIS 242, GLU 244, CYS 245, CYS 246, HIS 247, GLY 248, ASP 249, LEU 250, CYS 253, ARG 257                                                                                                                                                                                                                                                                                                               |
| <b>1</b> | ARG 114, LEU 115, ARG 117, LEU 135, TYR 138, ILE 142, TYR 161, PHE 165, ARG 186, LYS 190                                                                                                                                                                                                                                                                                                                                                                                                                                                                                         |
| <b>2</b> | ARG 114, LEU 115, ARG 117, LEU 135, TYR 138, ILE 142, TYR 161, PHE 165, ARG 186, LYS 190                                                                                                                                                                                                                                                                                                                                                                                                                                                                                         |

|          |                                                                                                                                       |
|----------|---------------------------------------------------------------------------------------------------------------------------------------|
| <b>3</b> | ARG 114, LEU 115, ARG 117, MET 123, TYR 138, TYR 161, ARG 186, LYS 190, TRP 214, GLU 425, ARG 428, LYS 432, LYS 479, GLU 520, ILE 523 |
| <b>4</b> | ARG 114, LEU 115, ARG 117, MET 123, TYR 138, TYR 161, ARG 186, LYS 190, TRP 214, GLU 425, ARG 428, LYS 432, LYS 479, GLU 520, ILE 523 |
